# Supplementary material for: Binding of sFRP-3 to EGF in the Extra-Cellular Space Affects Proliferation, Differentiation and Morphogenetic Events Regulated by the Two Molecules
Source: PLoS One. 2008 Jun 18;3(6):e2471. doi: 10.1371/journal.pone.0002471 (PMC2424011; doi:10.1371/journal.pone.0002471)
Supplement: Table S1 — The table shows the percentage of cells in G0/G1, S and G2/M, at t0, t18 and t20, calculated using the CellQuest analysis software. (0.03 MB DOC) [file pone.0002471.s005.doc]

|  | C | | | SRP3 | | | Wnt1 | | |
| --- | --- | --- | --- | --- | --- | --- | --- | --- | --- |
| Time | Go/G1 | S | G2/M | Go/G1 | S | G2/M | Go/G1 | S | G2/M |
| 0h | 98,33,2 | 1,30,3 | 0,70,1 | 93,55,6 | 1,40,6 | 5,10,1 | 97,55,6 | 0,370,3 | 2,130,6 |
| 18h | 53,52,3 | 30,71,2 | 15,80,6 | 88,96,3 | 9,51,2 | 1,60,1 | 43,92,9 | 25,23,9 | 30,91,2 |
| 20h | 48,53,7 | 28,41,7 | 23,12,3 | 65,25,6 | 15,91,3 | 18,20,9 | 33,22,9 | 31,51,9 | 35,91,8 |

**Table S2.**
